# Supplementary figures and images for: Influence of the gelator structure and solvent on the organisation and chirality of self-assembling fibrillar networks
Source: Royal Society of Chemistry journal article supplement (doi:10.1039/b714375c), 2008-01-01

Supporting information

Figure S1. UV-vis spectra of **2** in toluene, at different concentrations, at 25°C.

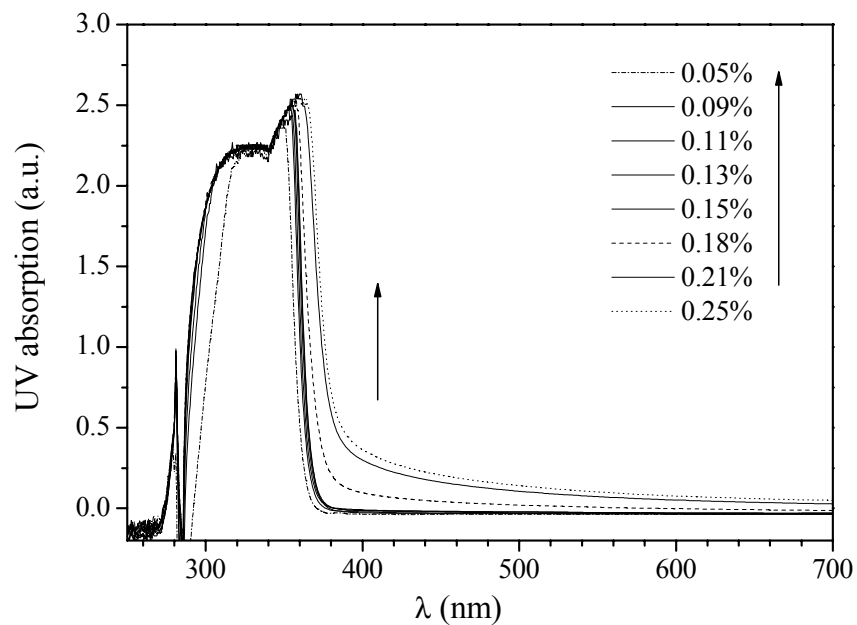

Supplement: b714375c.pdf [file b714375c.pdf]
